# Supplementary material for: Comparative Transcriptomics of Ex Vivo, Patient-Derived Endothelial Cells Reveals Novel Pathways Associated With Type 2 Diabetes Mellitus
Source: PubMed Central journal article supplement — JACC Basic Transl Sci. 2019 Sep 23;4(5):567–74. doi: 10.1016/j.jacbts.2019.05.012 (PMC6872769; doi:10.1016/j.jacbts.2019.05.012), 2019-09-23
Supplement: mmc1.pdf [file mmc1.pdf]

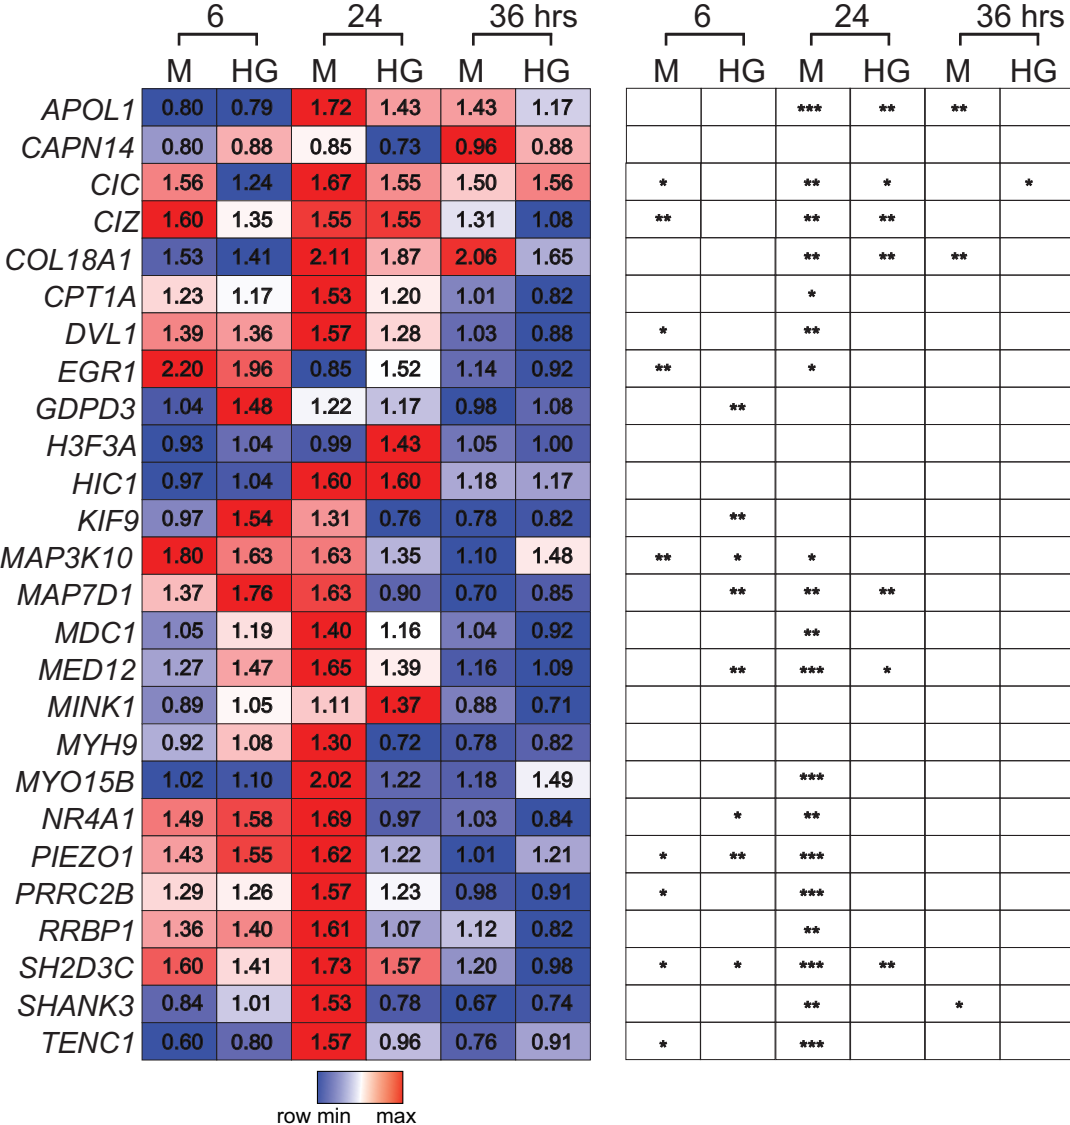

**Supplementary Figure 1: High glucose and mannitol regulate HUVEC gene expression.** Heat map showing the row normalized maximum fold change in each gene at 6, 24 and 36 hr time measured by real-time qPCR. Time 0 was set to 1 in this analysis. Each time point is compared to Time 0. M = mannitol 25 mM. HG = high glucose 25 mM (n=4 replicates per treatment group). Statistically significant differences in expression were determined using 2-way ANOVA with Dunnett's multiple comparisons test compared to Time 0 samples. \* p-value < 0.05; \*\* p-value < 0.01; \*\*\* p-value < 0.001. Squares left blank were not statistically significantly different.

### **Supplementary Figure 1. High Glucose and Mannitol Regulate HUVEC Gene Expression.**

Heatmap showing the row normalized maximum fold change in each gene at 6-, 24-, and 36-hour time measured by real-time qPCR. Time 0 was set to 1 in this analysis. Each time point is compared with Time 0.

M = mannitol 25 mM; HG = high glucose 25 mM (n = 4 replicates per-treatment group).

Statistically significant differences in expression were determined using 2-way ANOVA with Dunnett's multiple comparisons test compared with Time 0 samples.

\* p value < 0.05; \*\* p value < 0.01; \*\*\* p value < 0.001. Squares left blank were not statistically significantly different.
